# Supplementary material
Source: PubMed Central journal article supplement (PMC2941141)
Supplement: NIHMS179837-supplement-Data_2.pdf [file NIHMS179837-supplement-Data_2.pdf]

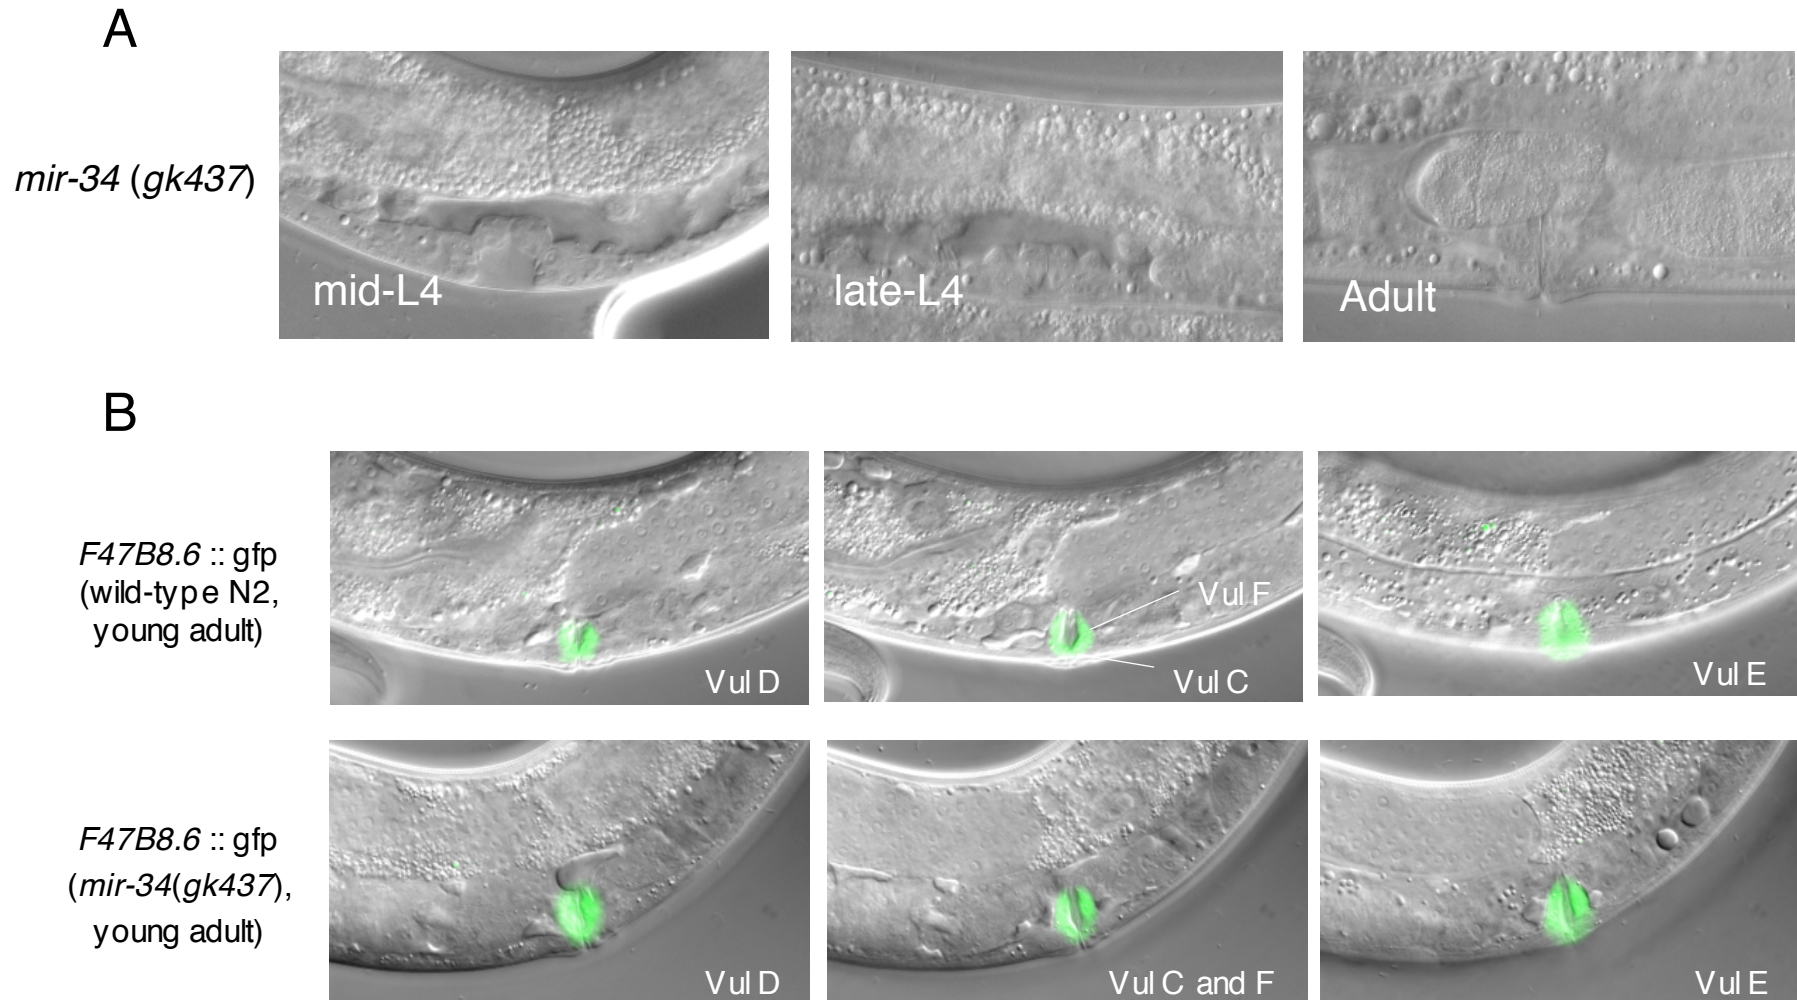

**Supplementary Information 2. Vulvae in *mir-34* loss-of-function mutants (*gk437*)** (A) Nomarski images of vulval development during mid-L4 to young adult stage in *mir-34* mutants (B) A *gfp* marker line, *F47B8.6::gfp*, shows *gfp* signals in the vulval cells, VulC, D, E and F after young adult stage in wild-type background. Similar expression pattern and timing were detected in *mir-34* loss-of-function background. In addition, *mir-34* mutants lay eggs normally (data not shown), suggesting that vulval function is not impaired in *mir-34* mutants.
