# Supplementary material
Source: PubMed Central journal article supplement (PMC2941141)
Supplement: NIHMS179837-supplement-Data_3.pdf [file NIHMS179837-supplement-Data_3.pdf]

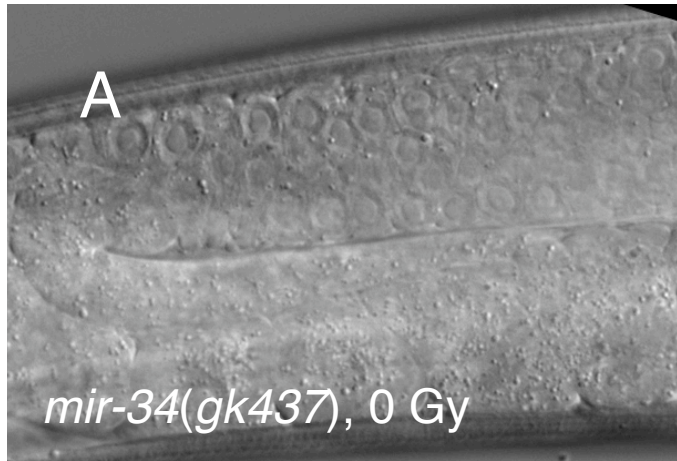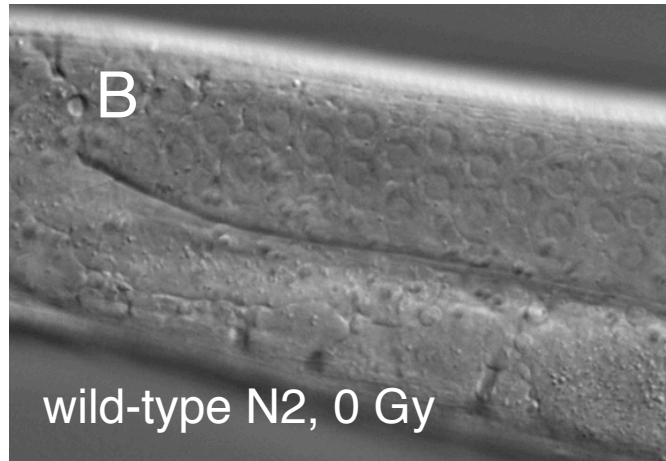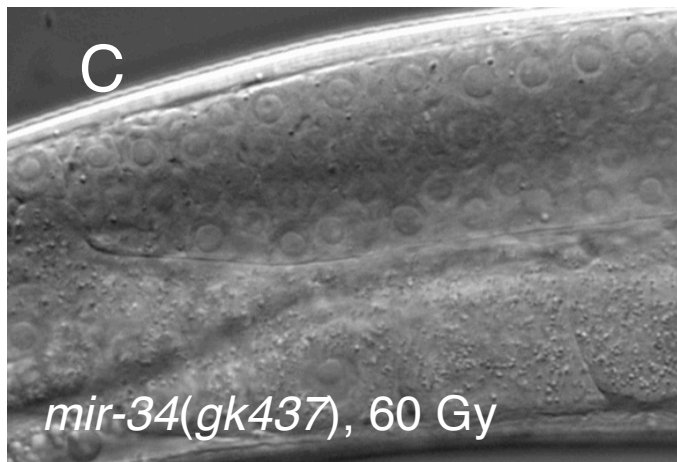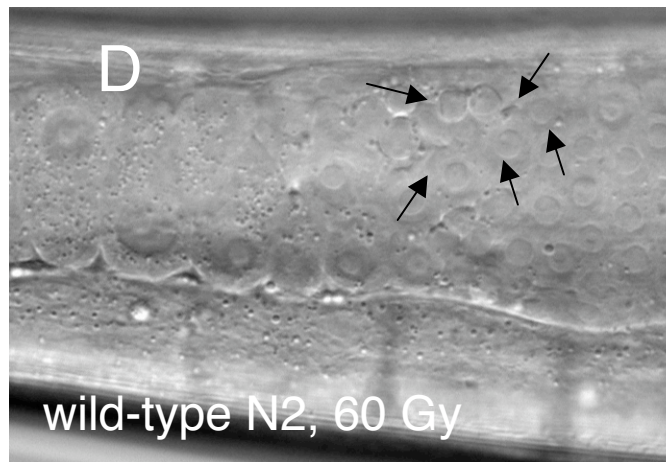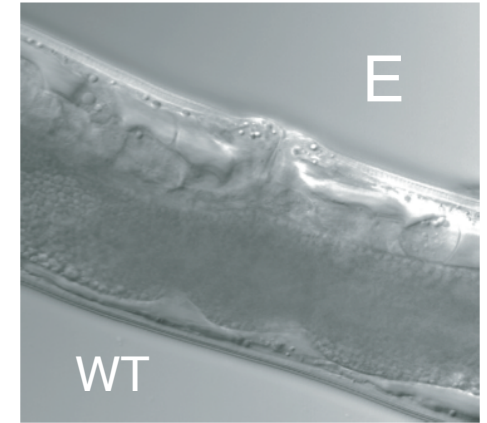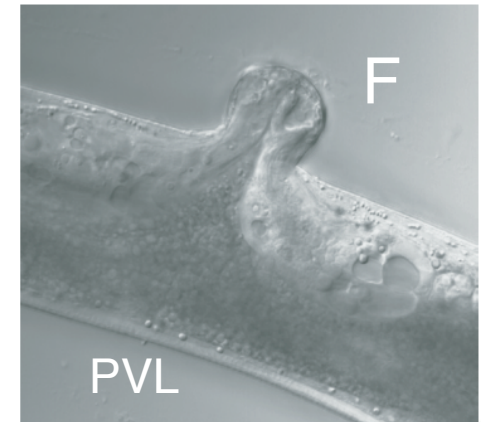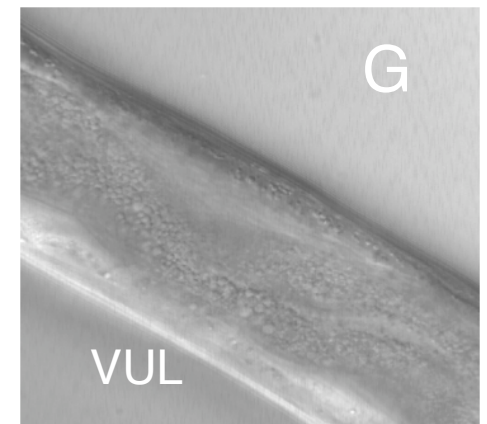

**Supplementary Information 3. Apoptotic bodies and abnormal vulvae induced by radiation.** (A-D) Hermaphrodites cultured at 20°C were irradiated at the L4 stage with 60 Gy, and images focused at the pachytene region were obtained at 24hrs post-irradiation. Arrows in the panel D represent apoptotic bodies in the germline. (E-G) Radiation causes vulval cell death that results in morphological abnormalities in the vulva, such as a protruding vulva (F) or a vulvaless (G). These images were obtained from wild-type N2 worms irradiated at the first S-phase radioresistance peak (determined as previously described in Weidhaas et al., 2006) with 200 Gy.
